# Supplementary material
Source: PubMed Central journal article supplement (PMC6712146)

**Figure S1 RAP1 deficiency hardly influenced the resistance of hMSCs to DNA damage stressors.**

(A) Cell viability of WT and *RAP1*<sup>-/-</sup> hMSCs (EP) treated with different DNA damage stressors was measured by MTS assay. Data were normalized to vehicle (DMSO)-treated group and were presented as the mean ± SEM, *n* = 3. NS, not significant.

(B) A table summarizing the dosage and effects of the DNA damage stressors.

**Figure S2 RAP1 deficiency influenced the differentiation of organoid-like cerebral structures from hESCs.**

(A) Diagram of organoid-like cerebral structures differentiation from hESCs. Modified from Lancaster et al. (2013).

(B) Immunofluorescence micrographs of WT and *RAP1*<sup>-/-</sup> organoid-like cerebral structures demonstrated reduced Reelin expression along with RAP1 deficiency. Scale bar, 50 μm.

(C) Statistical scatter diagram of relative Reelin-positive cell counts. Data were presented as mean ± SEM, *n* = 200. \*\*\**P* < 0.001.

(D) qRT-PCR analysis demonstrated the deletion of *RAP1* at the transcriptional level in *RAP1*<sup>-/-</sup> cerebral-organoid like tissues by primers P8 and P9. Data were presented as the mean ± SEM, *n* = 3. \*\*\**P* < 0.001.

(E) qRT-PCR analysis demonstrated the downregulation of *RELN* in *RAP1*<sup>-/-</sup> organoid-like cerebral structures. Data were presented as the mean ± SEM, *n* = 3. \*\*\**P* < 0.001.

**Figure S3 RAP1 deficiency had no effect on the neuronal differentiation and migration abilities of hNSCs.**

(A) Representative brightfield and immunofluorescence micrographs of neurons showed comparable neuronal differentiation ability of WT and *RAP1*<sup>-/-</sup> hNSCs. Scale bar, 50 μm.

(B) Transwell analysis showed comparable migration ability of WT and *RAP1*<sup>-/-</sup> hNSCs. Scale bar, 50 μm. Data were presented as mean ± SEM, *n* = 6. NS, not significant.

Figure S1

A

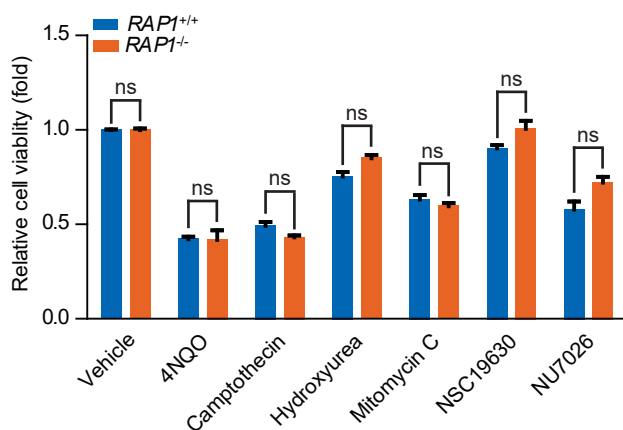

B

| Stressor     | Main Effects                                                                                | Dose        |
|--------------|---------------------------------------------------------------------------------------------|-------------|
| 4NQO         | Inducing DNA damage by producing reactive oxygen species                                    | 50 $\mu$ M  |
| Camptothecin | Inhibiting of topoisomerase and inducing DNA damage by preventing DNA re-ligation           | 5 $\mu$ M   |
| Hydroxyurea  | Inhibiting DNA replication, inhibiting DNA repair and inducing DNA double strand breaks     | 50 mM       |
| Mitomycin C  | Alkylating DNA and forming DNA cross-links; inhibiting DNA synthesis                        | 100 $\mu$ M |
| NSC19630     | Inhibiting WRN (a DNA helicase related to DNA repair, replication, telomere maintenance...) | 5 $\mu$ M   |
| NU7026       | Inhibiting DNA-PK (a complex related to double-strand DNA breaks repair by NHEJ)            | 100 mM      |

Figure S2

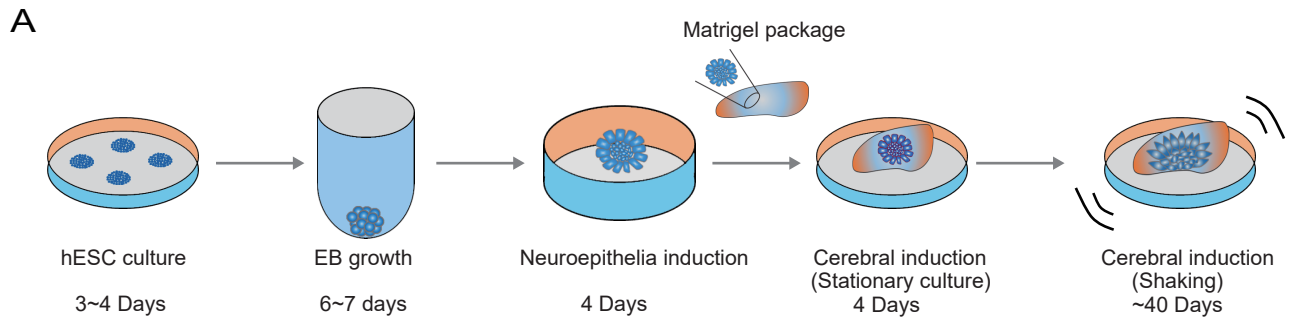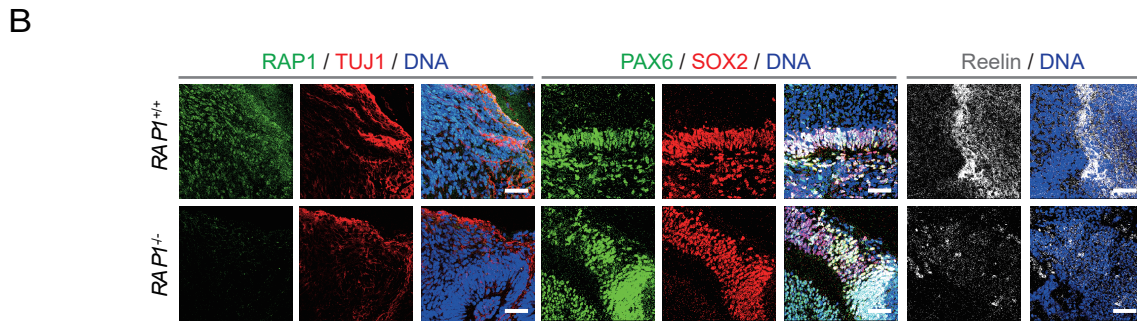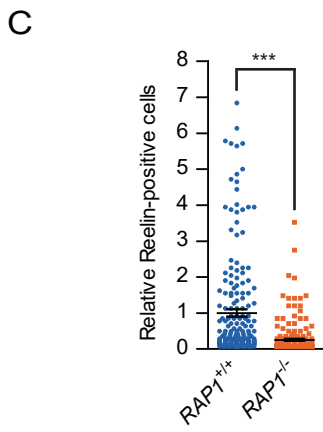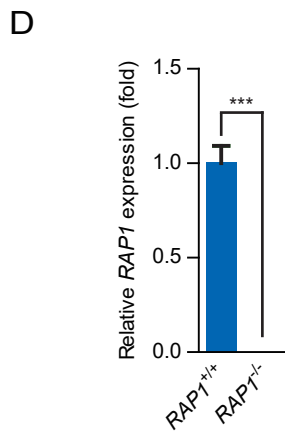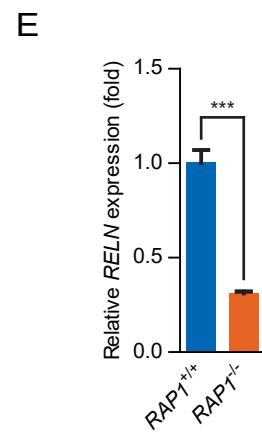

Figure S3

A

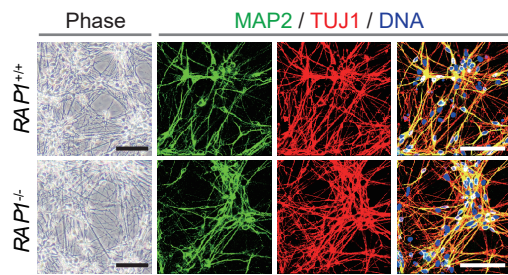

B

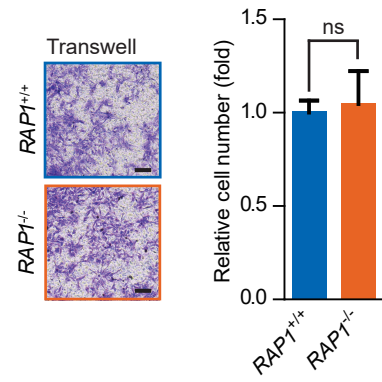

Supplement: 13238_2019_610_MOESM1_ESM.pdf [file 13238_2019_610_MOESM1_ESM.pdf]
